# Supplementary material for: (1-Naphthyl)phenylamino functionalized three-coordinate organoboron compounds: syntheses, structures, and applications in OLEDs
Source: Royal Society of Chemistry journal article supplement (doi:10.1039/b506840a), 2005-01-01

Electronic supplementary information (ESI)

**(1-Naphthyl)phenylamino Functionalized Three-Coordinate  
Organoboron Compounds: Syntheses, Structures, and Applications in  
OLEDs**

Wen Li Jia,<sup>†</sup> Mark J. Moran<sup>†</sup>, Yan-Yan Yuan,<sup>‡</sup> Zheng Hong Lu<sup>‡</sup>, Suning Wang<sup>†\*</sup>

<sup>†</sup>Department of Chemistry, Queen's University, Kingston, Ontario, K7L 3N6, Canada

<sup>‡</sup>Department of Materials Science and Engineering, University of Toronto, Toronto,  
Ontario, M5S 3E4, Canada

Performance of EL devices using BNPB or CuPc as the hole injection layer. Device structure: ITO/BNPB (or CuPc)/NPB/Alq<sub>3</sub>/NBB/LiF-Al where NBB is an undisclosed electron injection material.

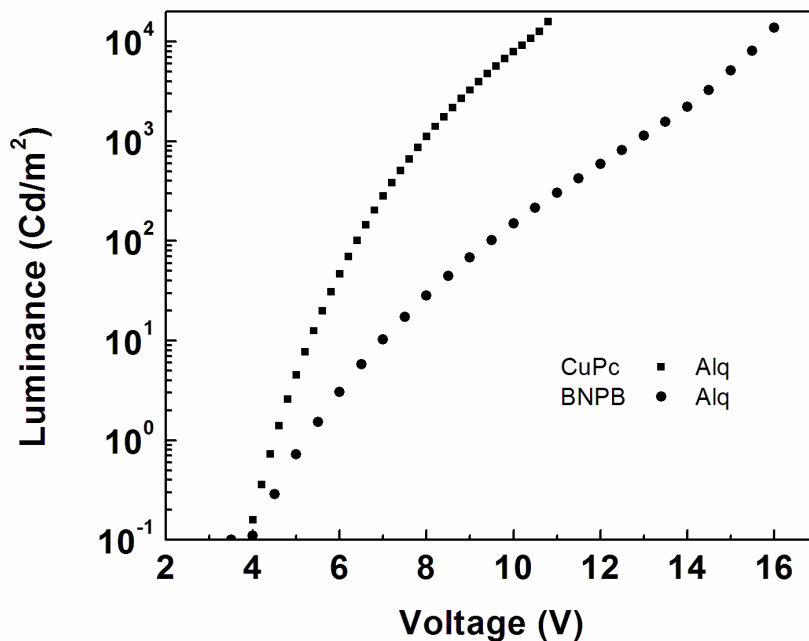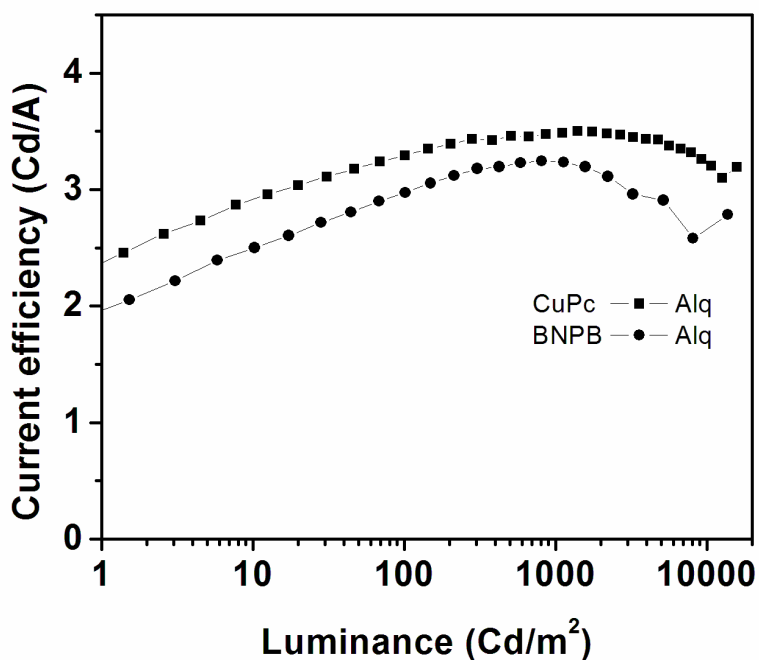

Supplementary Material (ESI) for Journal of Materials Chemistry  
This journal is © The Royal Society of Chemistry 2005

Variable temperature  $^1\text{H}$  NMR spectra for BNPB (showing the methyl region)

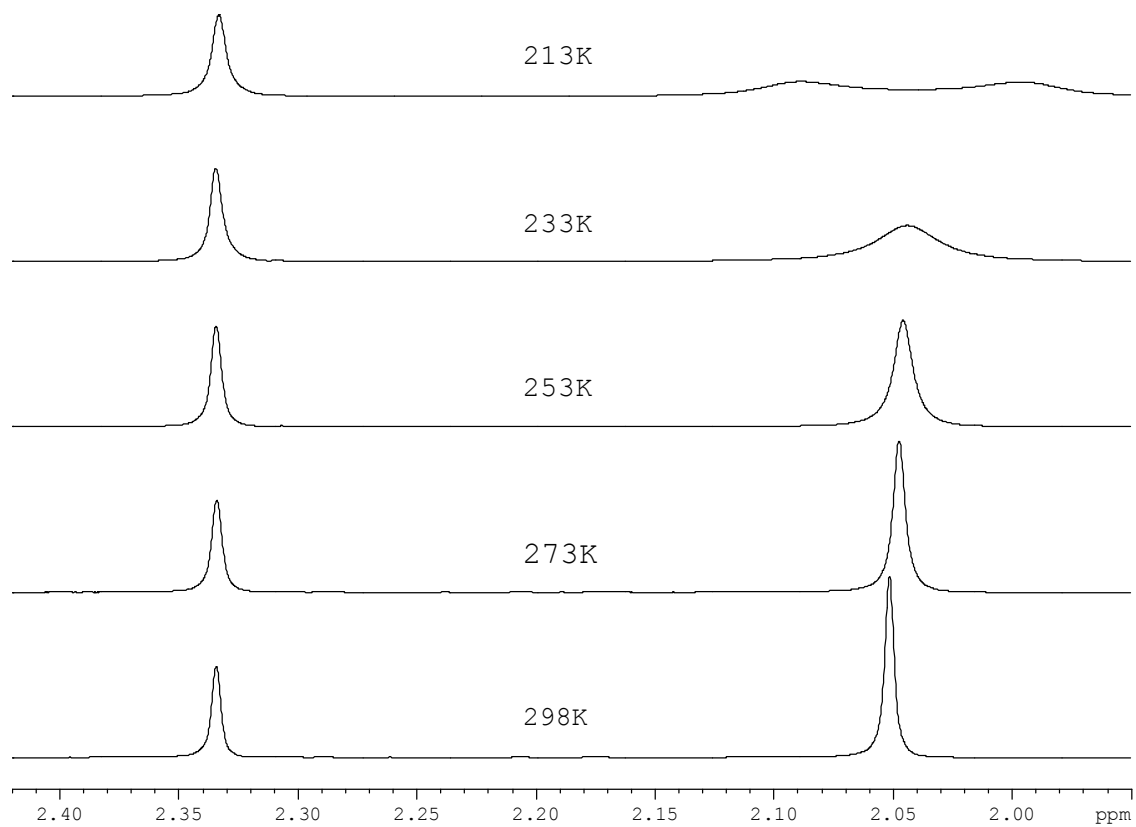

Absorption, excitation and emission spectra of **1**

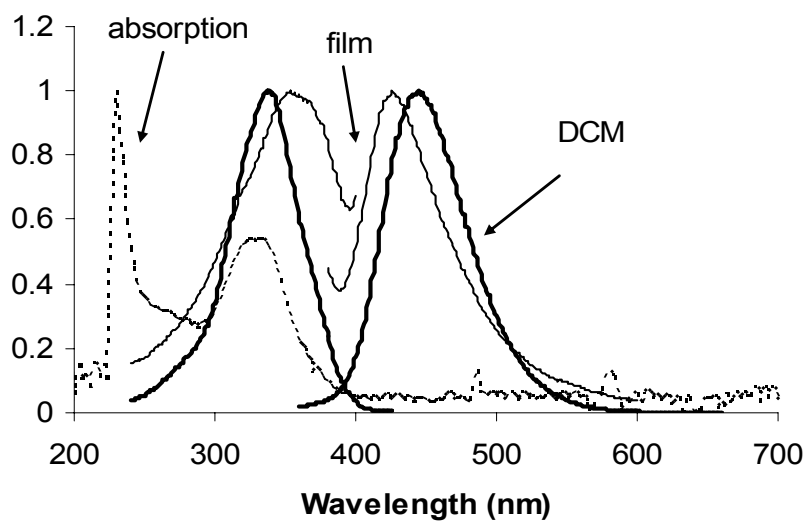

Absorption, excitation and emission spectra of **2**

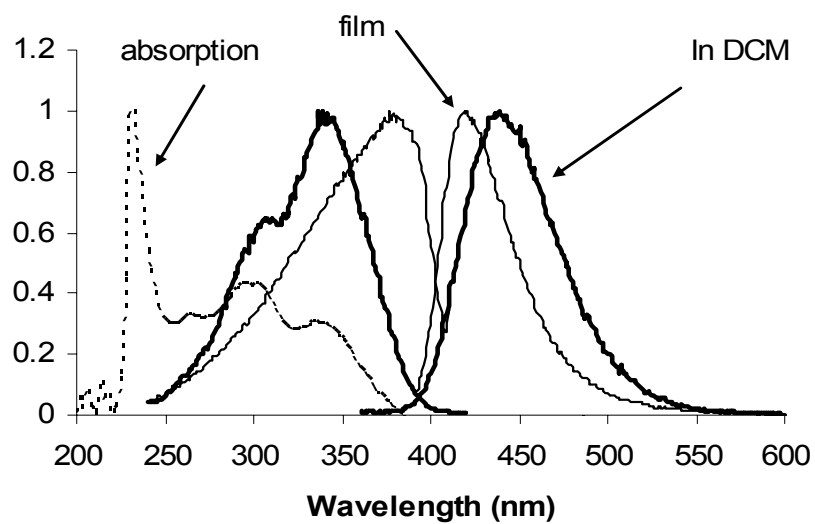

Absorption, excitation and emission spectra of **3**

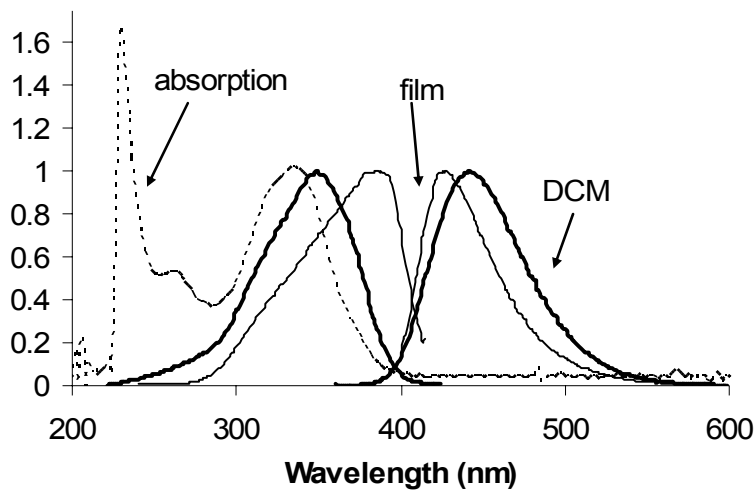

CV of compound **1** in  $\text{CH}_2\text{Cl}_2$

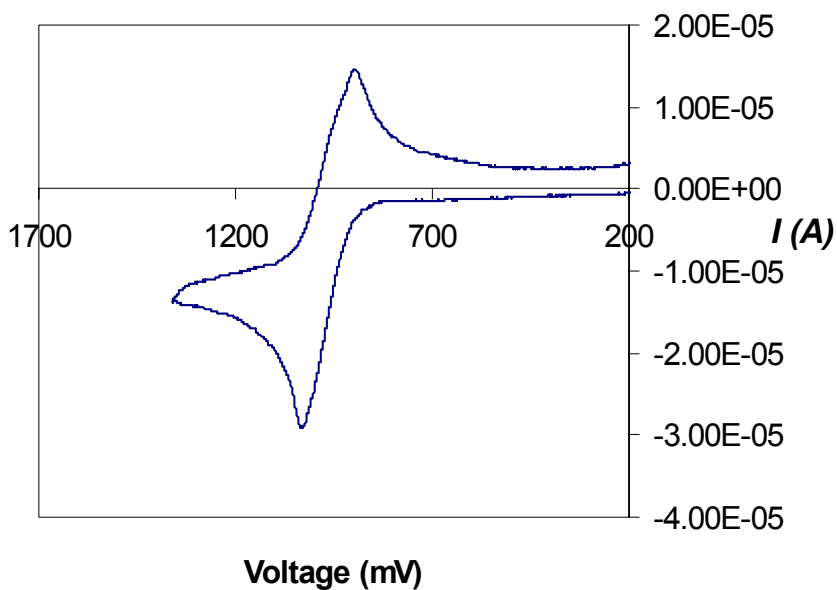

CV of compound **2** in CH<sub>2</sub>Cl<sub>2</sub>

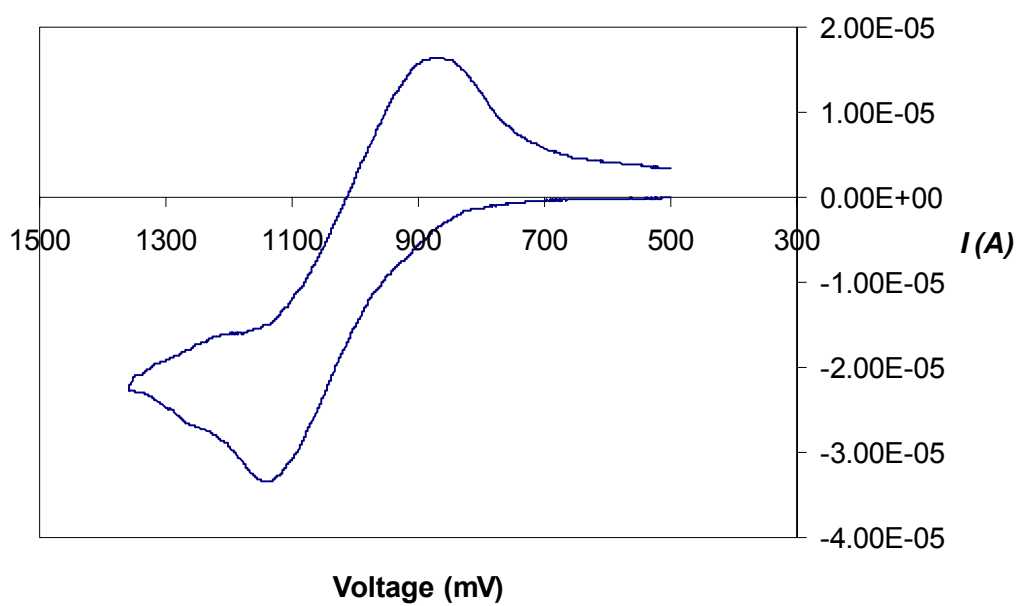

CV of compound **3** in CH<sub>2</sub>Cl<sub>2</sub>

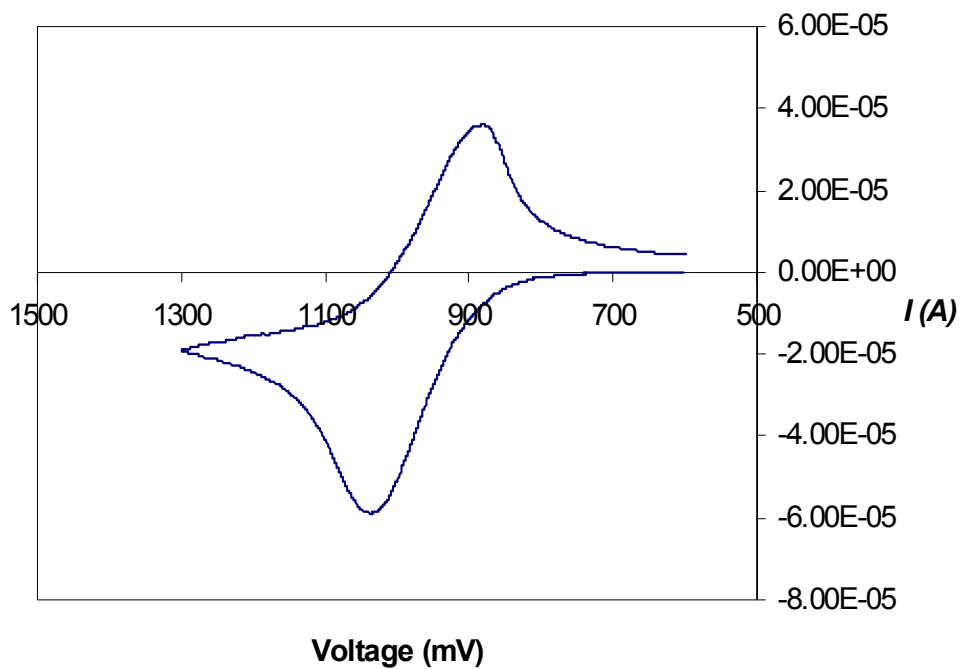

Supplement: b506840a.pdf [file b506840a.pdf]
